# Supplementary material for: Characterization of the virome of shallots affected by the shallot mild yellow stripe disease in France
Source: PubMed Central journal article supplement (PMC6655591; doi:10.1371/journal.pone.0219024), 2019-07-24
Supplement: pone.0219024.s001.pdf [file pone.0219024.s001.pdf]

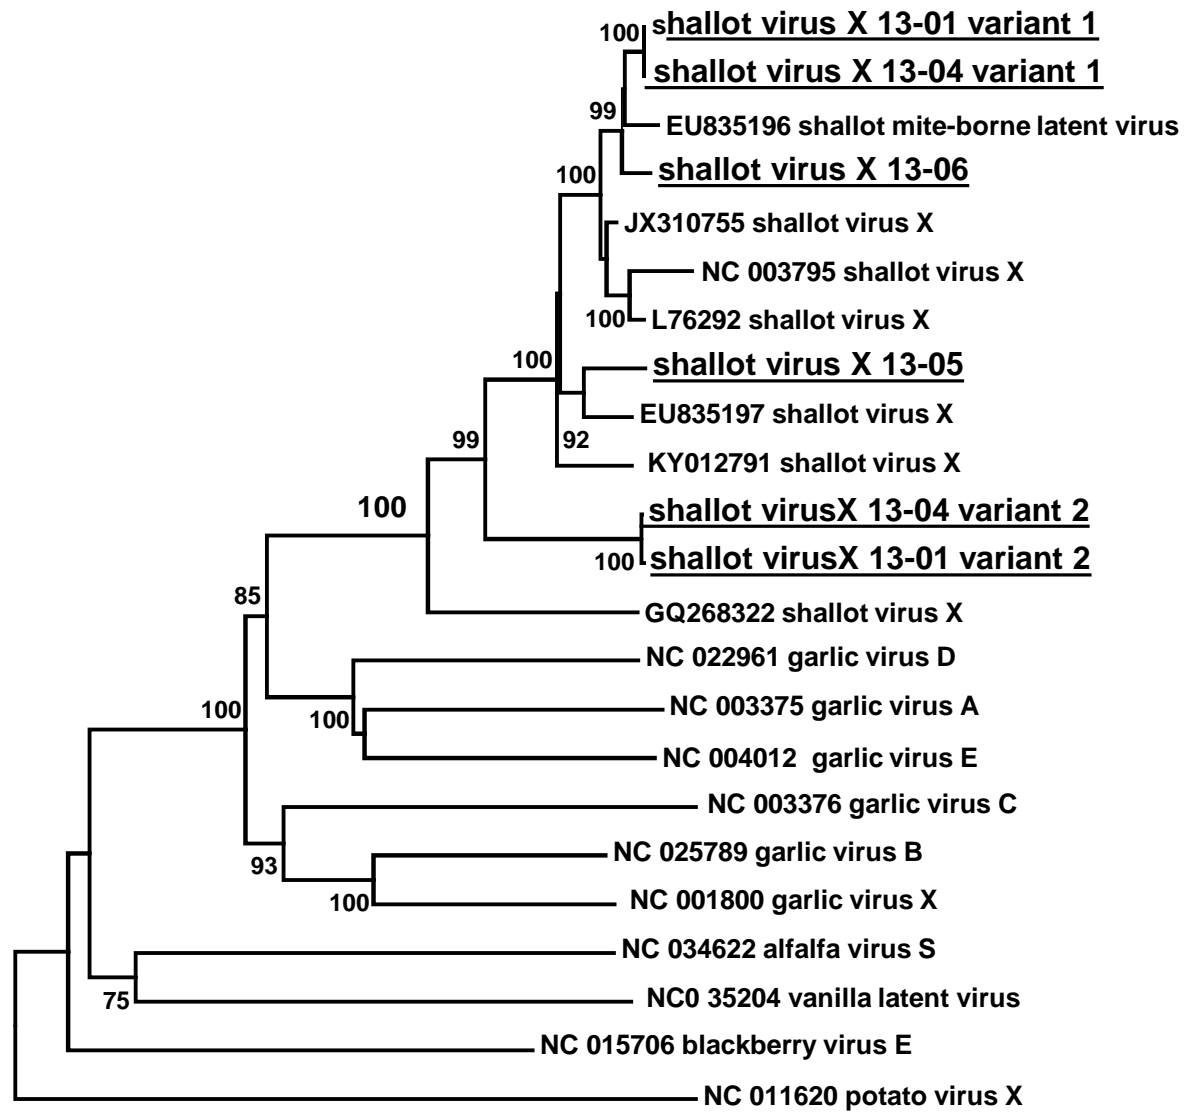

0.05
