# Supplementary material for: Characterization of the virome of shallots affected by the shallot mild yellow stripe disease in France
Source: PubMed Central journal article supplement (PMC6655591; doi:10.1371/journal.pone.0219024), 2019-07-24
Supplement: pone.0219024.s007.pdf [file pone.0219024.s007.pdf]

1 **Characterization of the virome of shallots affected**  
2 **by the shallot mild yellow stripe disease in France**

3  
4  
5 Armelle Marais\*, Chantal Faure, Sébastien Theil, Thierry Candresse

6  
7  
8  
9 UMR 1332, Biologie du Fruit et Pathologie, INRA, Université de Bordeaux, Villenave  
10 d'Ornon, France

11  
12  
13  
14 \* Corresponding author

15 E-mail : [armelle.marais-colombel@inra.fr](mailto:armelle.marais-colombel@inra.fr) (AM)

16  
17  
18 **Short title:** Novel Poty- and Carlavirus of Shallot

19

20

## 21 Abstract

22 To elucidate the etiology of a new disease on shallot in France, double-stranded  
23 RNAs from asymptomatic and symptomatic shallot plants were analyzed by high-  
24 throughput sequencing (HTS). ~~Contigs annotation~~ molecular characterization and  
25 phylogenetic analyses revealed the presence in symptomatic plants of a virus complex  
26 consisting of shallot virus X (ShVX, *Allexivirus*), shallot latent virus (SLV, *Carlavirus*)  
27 and two novel viruses belonging to the genera *Carlavirus* and *Potyvirus*, for which the  
28 names of shallot virus S (ShVS) and shallot mild yellow stripe associated virus  
29 (SMYSaV), are proposed. Complete or near complete genomic sequences were  
30 obtained for all these agents, revealing divergent isolates of ShVX and SLV. Trials to  
31 fulfill Koch's postulates were pursued but failed to reproduce the symptoms on  
32 inoculated shallots, even though the plants were proved to be infected by the four  
33 viruses detected by HTS. Replanting of bulbs from SMYSaV-inoculated shallot plants  
34 resulted in infected plants, showing that the virus can perpetuate the infection over  
35 seasons. A survey analyzing 351 shallot samples over a four years period strongly  
36 suggests an association of SMYSaV with the disease symptoms. An analysis of  
37 SMYSaV diversity indicates the existence of two clusters of isolates, one of which is  
38 largely predominant in the field over years.

39

40 **Keywords:** shallot, *Allium*, Potyvirus, Carlavirus, Allexivirus, high-throughput  
41 sequencing, etiology

42

43 The sequences reported in the present manuscript have been deposited in the  
44 GenBank database under accession numbers MG571549, MH292861, MH389247 to  
45 MH389255, and MG910501 to MG910598.

# Summary of Comments on Microsoft Word - Marais-Plos One

---

Page: 2

---

 Number: 1      Author:      Subject: Inserted Text      Date: 6/26/2019 10:32:11 AM  
of

---

 Number: 2      Author:      Subject: Inserted Text      Date: 6/26/2019 10:33:13 AM  
using

---

 Number: 3      Author:      Subject: Inserted Text      Date: 6/26/2019 10:33:50 AM  
Annotation of contigs

---

## 46 Introduction

47 Economically important cultivated *Allium* species are garlic (*Allium sativum*), leek  
48 (*Allium ampeloprasum* var. *porrum*), onion (*Allium cepa*), and its relative shallot (*Allium*  
49 *cepa* L. var. *aggregatum*) [1]. Shallot is mainly cultivated for culinary purposes, while  
50 onion and garlic are also used in traditional medicine. Viral infections are a significant  
51 problem for all *Allium* crops, even more so in the case of shallot and garlic which are  
52 exclusively vegetative propagated, leading to the accumulation of viruses in planting  
53 material [2]. Due to their prevalence and the damages they cause, the most  
54 economically important *Allium* viruses are members of the genus *Potyvirus*, particularly  
55 onion yellow dwarf virus (OYDV) and leek yellow stripe virus (LYSV). In the  
56 Mediterranean basin, shallot yellow stripe virus (SYSV) and turnip mosaic virus (TuMV)  
57 have also been described infecting *Allium* species, as well as four other potyviruses of  
58 lower incidence, even though TuMV has not been reported on shallot so far [2].  
59 Potyviruses and carlaviruses are transmitted non persistently by aphids and frequently  
60 found on cultivated *Allium* species. The first described *Allium*-infecting carlavirus was  
61 shallot latent virus (SLV, synonym with garlic latent virus, GLV), which seems to be  
62 asymptomatic in garlic, onion and shallot when in single infection but can cause  
63 significant yield losses in the presence of potyviruses due to synergistic effects [3].  
64 Another carlavirus (garlic common latent virus, GarCLV) is frequently detected on  
65 garlic, onion and leek, associated with symptomless infection. Eight viral species  
66 belonging to the genus *Allexivirus* in the family *Alphaflexiviridae* have also been  
67 described from *Allium* species. Only two of them, shallot virus X (ShVX) and shallot  
68 mite-borne latent virus (SMbLV) have been described in shallot, in which they cause  
69 latent infections. All allexiviruses are transmitted by mites and coinfections with  
70 potyviruses and carlaviruses are frequent, with potential synergistic effects that could

The economically

71 lead to increased damages [2]. Besides the viruses belonging to the *Allexivirus*,  
72 *Potyvirus*, and *Carlavirus* genera, five other viruses infecting *Allium* species have been  
73 described, generally with limited incidence, including iris yellow spot virus (IYSV), a  
74 member of the genus *Orthospovirus*, reported on shallot [4].

75 In 2012, a new disease was observed in the west of France in shallots. Symptoms  
76 consisted of yellow stripes on the leaves, associated with a loss of vigor, considered  
77 as moderate as compared to that caused by OYDV or LYSV (Fig 1). This gave its name  
78 to the disease, shallot mild yellow stripe disease (SMYSD). Early tests revealed that  
79 the new disease could be observed in plants that test negative for OYDV and LYSV,  
80 indicating that these two viruses were not involved. In parallel, meristem-tip culture  
81 from symptomatic plants led to the disappearance of the symptoms, reinforcing the  
82 hypothesis of a viral etiology. The present study was therefore initiated with the  
83 objective to identify the causal agent(s) of this new disease.

84

85 **Fig 1. Symptoms associated with the shallot mild yellow stripe disease on shallot**  
86 **plant.**

87

88

## 89 **Materials and methods**

### 90 **Plant samples**

91 Six samples (13-01 to 13-06) of shallot (*Allium cepa* L. var. *aggregatum*) were  
92 collected in West France in 2013 and analyzed by high-throughput sequencing (HTS).  
93 Two of these samples were from asymptomatic plants while the other four showed  
94 symptoms of the novel SMYS disease. In addition to these samples analyzed by HTS,  
95 a total of 351 symptomatic or asymptomatic shallot samples was collected over a four-  
96 year period (2014 to 2017) and screened for the presence of OYDV, LYSV and for the  
97 novel viruses detected in the present study. The symptoms observed on these plants  
98 were recorded using a 0 to 3 notation scale for both leaf striping and loss of vigor. The  
99 “0” score is defined as no symptom, the “3” score is defined as a symptomatology  
100 equivalent to that observed on control plants infected by OYDV. The “1” and “2” scores  
101 are used for symptoms of intermediate intensity.

102

### 103 **Illumina sequencing of double-stranded RNAs from shallot** 104 **samples**

105 Double-stranded RNAs (dsRNAs) were purified from the two asymptomatic  
106 plant samples (13-01 and 13-02) and the four symptomatic ones (13-03 to 13-06),  
107 following the protocol previously described [5]. After reverse transcription and random  
108 amplification, the obtained cDNAs were used for the preparation of libraries and  
109 sequenced in multiplex format (Illumina HiSeq 2000 in paired end 2x 100 nt reads).  
110 After quality trimming and demultiplexing steps [6], reads were assembled into contigs  
111 which were annotated by BlastN and BlastX comparisons [7] against the GenBank  
112 database using CLC Genomics Workbench 8. When needed, contigs corresponding

using



113 to particular agents were further extended by several rounds of mapping of  
114 unassembled reads and/or assembled manually into scaffolds by alignment against  
115 reference viral genomes identified during the Blast analyses.

116

## 117 **Total nucleic acids extraction and detection of selected** 118 **viruses by RT-PCR**

119 Total nucleic acids were extracted from shallot samples and from the test plants  
120 of the host range experiments using the silica-capture procedure 2 described by [8].  
121 The viruses were detected by two-step RT-PCR assays, following the procedure  
122 already described [9] and using specific primers (Table S1). The amplified fragments  
123 were visualized on non-denaturing 1% agarose gels and, if needed, submitted to direct  
124 Sanger sequencing on both strands (GATC Biotech, Mulhouse, France).

125

## 126 **Completion of the genome sequences of the novel viruses** 127 **and of divergent isolates of shallot latent virus (SLV) and** 128 **shallot virus X (ShVX)**

129 The 5' ends of the viral genomes sequences were determined or confirmed  
130 using the 5' Rapid Amplification of cDNA Ends (RACE) strategy and internal primers  
131 designed from the genomic contigs (Table S1) following the kit supplier's  
132 recommendations (Takara Bio Europe/Clontech, Saint Germain-en-Laye, France).  
133 The 3' ends were amplified using forward internal and polyA-anchored LD primers  
134 (Table S1) as described [10]. Internal gaps and regions of low coverage were  
135 determined or confirmed by direct sequencing of RT-PCR fragments obtained using  
136 internal primers designed from the contigs (Table S1). All amplified fragments were

137 visualized on non-denaturing agarose gels and directly sequenced on both strands by  
138 Sanger sequencing (GATC Biotech).

139

## 140 **Sequence analysis, comparisons, and phylogenetic** 141 **analyses**

142 Phylogenetic and molecular evolutionary analyses were conducted using  
143 MEGA version 6 [11]. Multiple ~~alignments of~~ nucleotide <sup>1</sup> amino acid sequences were  
144 performed using the ClustalW program [12] as implemented in MEGA6. Phylogenetic  
145 trees were reconstructed using the neighbor-joining method with strict nucleotide or  
146 amino acid distances and randomized bootstrapping for the evaluation of branching  
147 validity. Mean diversities and genetic distances (p-distances calculated on nucleotide  
148 or amino acid identity) were calculated using MEGA6.

149

## 150 **Host range determination for both novel viruses**

151 A mix <sup>4</sup> of leaves from four plants identified as infected by the novel potyvirus but  
152 not by the novel carlavirus, OYDV or LYSV was used as the first inoculum. Similarly,  
153 a mix <sup>5</sup> of leaves from four plants known to be infected by the new carlavirus but free of  
154 the new potyvirus, of OYDV or LYSV was used as the second inoculum. All pools of  
155 leaves were ground 1:4 (wt/vol) in a solution of 0.03 M Na<sub>2</sub>HPO<sub>4</sub> containing 0.2%  
156 sodium diethyldithiocarbamate (DIECA), and 100 mg each of carborundum and  
157 activated charcoal were added before rub-inoculation. A total number of 59 *Nicotiana*  
158 *benthamiana* plants, 48 *Chenopodium quinoa*, 34 *C. amaranticolor*, 31 *N. occidentalis*,  
159 and 23 *N. tabacum* cv xanthi were evaluated as potential hosts for the novel potyvirus  
160 and 23 plants of each species were used for trials involving the new carlavirus. The

---

 Number: 1 Author: Subject: Cross-Out Date: 6/26/2019 10:52:10 AM

---

 Number: 2 Author: Subject: Inserted Text Date: 6/26/2019 10:52:02 AM  
alignments

---

 Number: 3 Author: Subject: Inserted Text Date: 6/26/2019 10:51:54 AM

---

 Number: 4 Author: Subject: Inserted Text Date: 6/26/2019 10:55:01 AM  
ture

---

 Number: 5 Author: Subject: Inserted Text Date: 6/26/2019 10:55:27 AM  
ture

---

161 appearance of symptoms was monitored over a three-week period. At the end of the  
162 experimentation, the presence of the virus(es) in non-inoculated parts of the test plants  
163 was assessed by specific RT-PCR assays.

164

## 165 **Trials to fulfill Koch's postulates**

166 Koch's postulates<sup>1</sup> were<sup>2</sup> evaluated separately for the two novel viruses and for a  
167 complex of four viruses (ShVX, SLV and the two novel viruses). A total of 21 virus-free  
168 shallots grown from seeds were inoculated with a mix of four plants shown to be co-  
169 infected by ShVX, SLV and the novel carlavirus and potyvirus. Plants were monitored  
170 for symptoms appearance over a five weeks period post inoculation. At the end of this  
171 period, the plants were tested by specific RT-PCR for the presence of the four  
172 inoculated viruses. In parallel, inoculation of shallot and onion plants was performed  
173 with an inoculum constituted of a pool of four plants known to be infected by the sole  
174 new potyvirus (63 and 40 plants of each *Allium* species, all grown from seeds) or  
175 infected only by the novel carlavirus (36 and 23 plants, respectively). A mix of leaves  
176 from two plants infected with the sole OYDV was used as a positive mechanical  
177 inoculation control. Bulbs from all inoculated shallot plants were replanted and the  
178 resulting plants observed over an eight months period and tested for the presence of  
179 inoculated viruses.

180

## 181 **Results**

### 182 **Illumina sequencing of double-stranded RNAs extracted** 183 **from asymptomatic and symptomatic shallot samples**

---

 Number: 1 Author: Subject: Cross-Out Date: 6/26/2019 10:56:45 AM

---

 Number: 2 Author: Subject: Inserted Text Date: 6/26/2019 10:56:53 AM  
was

184 After demultiplexing, quality trimming, and *de novo* assembly, BlastN and BlastX  
185 comparisons of the contigs obtained with the GenBank database showed that all  
186 sources but one (13-01) were infected by more than one viral species (Table 1). For  
187 the 13-01 asymptomatic sample, 174,381 reads were integrated into contigs with high  
188 homology to isolates of shallot virus X (ShVX, genus *Allexivirus*, family  
189 *Alphaflexiviridae*). Two variants of ShVX were identified and reassembled from that  
190 plant, differing by their level of nucleotide (nt) identity with known ShVX sequences.  
191 Most of the reads (151,580) were integrated into contigs (hereafter referred to as ShVX  
192 13-01 variant 1) closely related to ShVX isolate JX310755 (97-98% of nt identity  
193 depending on the contigs). More divergent contigs (hereafter referred to as ShVX 13-  
194 01 variant 2) integrating 22,801 reads could also be assembled. They showed between  
195 82 and 90% of nt identity with JX310755, depending on the contig (Table 1). In the  
196 other asymptomatic sample (13-02), two viruses were detected: a divergent isolate of  
197 shallot latent virus (SLV, genus *Carlavirus*, family *Betaflexiviridae*), integrating 249,097  
198 reads and sharing around 83% of nt identity with reference SLV isolates, and a putative  
199 novel carlavirus. Indeed, a total of 27,786 reads (corresponding to 1.9% of the total  
200 reads) were integrated into contigs sharing relatively weak nt identities (71-75%  
201 depending on the contig) with various carlaviruses. In the four symptomatic samples  
202 (13-03 to 13-06), besides the presence of one or more of the above viruses (Table 1),  
203 contigs integrating between 43,683 and 105,209 reads depending on the sample and  
204 showing at most 74% of nt identity with leek yellow stripe virus (LYSV, genus *Potyvirus*,  
205 family *Potyviridae*) were detected, leading to the hypothesis of the presence of a novel  
206 potyvirus.

207 In the end, the complete genomic sequences of seven viral isolates were  
208 obtained (Table 1): ShVX variant 1 from samples 13-05 and 13-06, ShVX variant 2

---

|                                                                                                         |                                |                             |
|---------------------------------------------------------------------------------------------------------|--------------------------------|-----------------------------|
|  Number: 1<br>assembled | Author: Subject: Inserted Text | Date: 6/26/2019 10:58:23 AM |
|  Number: 2<br>assembled | Author: Subject: Inserted Text | Date: 6/26/2019 10:58:53 AM |
|  Number: 3<br>assembled | Author: Subject: Inserted Text | Date: 6/26/2019 1:07:51 PM  |
|  Number: 4<br>assembled | Author: Subject: Inserted Text | Date: 6/26/2019 1:08:30 PM  |

---

209 from sample 13-04, SLV from samples 13-02 and 13-06, the novel carlavirus from  
210 sample 13-05 and the novel potyvirus from sample 13-06. Moreover, near complete  
211 genome sequences of three additional ShVX isolates (two from sample 13-01, and one  
212 from sample 13-04) and of one additional SLV isolate (from sample 13-03) were also  
213 obtained during the assembly process (Table 1) but no specific effort was made to  
214 complete their missing 5' and 3' genome ends.

215 Besides the whole genome sequence determined for the novel carlavirus,  
216 scaffolds of 8,234-8,303 nt and having up to four short internal gaps and missing short  
217 terminal sequences were also assembled from samples 13-02, 13-03, and 13-04. In  
218 parallel, besides the determined complete genome sequence of the novel potyvirus,  
219 scaffolds of 10,318-10,360 nt and containing up to four short internal gaps were also  
220 assembled from the other infected samples (13-03, 13-04, 13-05).

221



222 **Table 1. Number and percentages of high-throughput sequencing reads (73 nucleotides average length) of shallot virus X**  
 223 **(variants 1 and 2), shallot latent virus, the novel carlavirus and the novel potyvirus in each sample analyzed by Illumina**  
 224 **sequencing.**

| Sample <sup>a</sup> | Total reads<br><sup>b</sup> | Shallot virus X                         |                                        | Shallot latent<br>virus                  | Novel carlavirus           | Novel potyvirus |
|---------------------|-----------------------------|-----------------------------------------|----------------------------------------|------------------------------------------|----------------------------|-----------------|
|                     |                             | Variant 1                               | Variant 2                              |                                          |                            |                 |
| 13-01 AS            | 328,460                     | 151,580 (46%)<br>MH389253 <sup>c</sup>  | 22,801 (6.9%)<br>MH389254 <sup>e</sup> |                                          |                            |                 |
| 13-02 AS            | 1,412,128                   |                                         |                                        | 249,097 (17.6%)<br>MH389247              | 27,786 (1.9%)              |                 |
| 13-03 S             | 505,315                     |                                         |                                        | 236,815 (46.9%)<br>MH389249 <sup>f</sup> | 13,684 (2.7%)              | 105,209 (20.8%) |
| 13-04 S             | 438,574                     | 60,019 (13.7%)<br>MH389255 <sup>d</sup> | 158,755 (36.2%)<br>MH389250            |                                          | 86,627 (19.7%)             | 48,064 (11%)    |
| 13-05 S             | 360,248                     | 139,070 (38.6%)<br>MH389251             |                                        |                                          | 81,900 (22.7%)<br>MH292861 | 43,683 (12.1%)  |

|         |         |               |  |               |  |              |
|---------|---------|---------------|--|---------------|--|--------------|
| 13-06 S | 778,696 | 34,273 (4.4%) |  | 257,193 (33%) |  | 86,044 (11%) |
|         |         | MH389252      |  |               |  | MG910502     |

225 Relevant GenBank accession numbers are indicated

226 <sup>a</sup> AS asymptomatic; S symptomatic

227 <sup>b</sup> After quality trimming

228 <sup>c</sup> genome sequence lacks 53 nt at the 5' end and 443 nt at the 3' end

229 <sup>d</sup> genome sequence lacks 7 nt at the 5' end and 111 nt at the 3' end

230 <sup>e</sup> genome sequence lacks 53 nt at the 5' end and 330 nt at the 3' end

231 <sup>f</sup> genome sequence lacks 84 nt at 5' end and 34 nt at 3' end

232

## 233 **Genomic organization and phylogenetic relationships of the** 234 **novel potyvirus**

235 The potyviral genome determined from sample 13-06 is 10,540 nt excluding the  
 236 poly (A) tail and encodes a polyprotein of 3,210 amino acids (aa) (Fig 2A). The 5' non  
 237 coding region (NCR) is 159 nt long, whereas the 3' NCR is 751 nt long, which is  
 238 significantly longer than for most potyviruses [13]. Based on the conserved cleavage  
 239 sites in the polyprotein sequence [14], the ten typical mature potyviral proteins could  
 240 be identified with estimated sizes of 422 aa (P1), 456 aa (HC-Pro, helper component  
 241 proteinase), 359 aa (P3), 52 aa (6K1), 635 aa (CI, cylindrical inclusion protein), 53 aa  
 242 (6K2), 192 aa (VPg, viral genome-linked protein), 242 aa (NIa, nuclear inclusion a),  
 243 513 aa (NIb, nuclear inclusion b), and 286 aa (CP, coat protein). The observed  
 244 cleavage sites in the polyprotein sequence were consistent with the known sites of  
 245 potyviruses (Fig 2A). In addition, a PIPO ORF (69 aa) was identified downstream of  
 246 the conserved slippage motif GAAAAAA (nt position 3283). All expected potyviral  
 247 conserved motifs were identified in the polyprotein, including in the HC-Pro the KITC  
 248 (aa position 472 to aa 475) and PTK (730 to 732) and in the CP the conserved DAG  
 249 that are all necessary for aphid transmission [15].

250

251 **Fig 2. Schematic representation of the genomic organization of the novel**  
 252 **potyvirus (A) and the novel carlavirus (B).** The open reading frames are depicted  
 253 by large boxes, and the Non-Coding Regions (5' and 3' NCR) by horizontal lines. (A)<sub>n</sub>:  
 254 PolyA tail. (A) The nine putative cleavage sites of the polyprotein are indicated, as well  
 255 as the predicted amino acid position for each mature protein in the polyprotein. P1,  
 256 helper component proteinase (HCPro), P3, 6K1, cylindrical inclusion (CI) protein, 6K2,



257 viral genome-linked protein (VPg), nuclear inclusion a (NIa), nuclear inclusion b (NIb),  
258 and coat protein (CP). The position of PIPO (Pretty Interesting Potyvirus ORF) is also  
259 indicated. The black ellipse represents the VPg attached to the 5' end of the genome.  
260 (B) Conserved motifs for viral methyltransferase (pfam 1660, Met), 2OG-Fe(II)  
261 oxygenase (pfam 03171, 2OG), peptidase C23 (pfam 05379, Pep), viral helicase 1  
262 (pfam 01443, Hel), and RNA-dependent RNA polymerase 2 (pfam 00978, RdRp)  
263 domains are shown within replicase. TGB 1, 2, 3, Triple gene block proteins 1, 2, and  
264 3. CP, coat protein. NABP, nucleic acid binding protein.

265

266 In order to determine the taxonomic relationships of this virus, a phylogenetic  
267 tree was reconstructed using the genomic sequences of representative members of  
268 the family *Potyviridae* (from P3 to CP genes, corresponding to the RNA1 of  
269 bymoviruses, Fig 3A). Sequence comparisons were then performed with the  
270 polyprotein, the coat protein, and the NIa-Pro-NIb genomic region and corresponding  
271 proteins of members of the genus *Potyvirus* (Table S2). The accepted molecular  
272 species demarcation criteria for the family *Potyviridae* are less than 76% nt identity or  
273 82% aa identity in the large ORF or its protein product [16]. By all the criteria, the  
274 detected potyvirus appears to be a distinct species, with clearly more distant identity  
275 levels with its closest fully sequenced relative, LYSV [at the best 68.8% nt identity in  
276 the large ORF (73.6% aa); (Table S2)]. The name of shallot mild yellow stripe  
277 associated virus (SMYSaV) is therefore proposed for this novel potyvirus.

278

279 **Fig 3. Unrooted phylogenetic trees based on the codon-aligned nucleotide**  
280 **sequences of the 3' part (from P3 to coat protein) of the polyproteins of**  
281 **representative *Potyviridae* family members (A) and on the coat protein**

282 **sequences of representative members of the genus *Potyvirus* (B).** The trees were  
283 constructed using the neighbor-joining method and statistical significance of branches  
284 was evaluated by bootstrap analysis (1,000 replicates). Only bootstrap values above  
285 70% are shown. The scale bar represents 5% nucleotide divergence (A) or 5% amino  
286 acid divergence (B). The genus to which each virus belongs is indicated at the right of  
287 the panel A. The novel potyvirus shallot mild yellow stripe associated virus is indicated  
288 by a black star.

289

290 In a phylogenetic analysis of the CP amino acid sequences, SMYsAV forms a  
291 small bootstrap-supported cluster with garlic virus 2, leek yellow stripe virus, and garlic  
292 mosaic virus (Fig 3B), forming a small group of agents of similar host specificity as  
293 observed for other potyviruses. The closest sequence to SMYsAV identified through  
294 GenBank Blast searches is a partial, 2,525 nt genome fragment (GenBank accession  
295 number L28079) corresponding to the partial protease (NIa-Pro) and RNA-dependent  
296 RNA polymerase (NIb) genes of a viral isolate from shallot (unpublished GenBank  
297 sequence). Over this region, the two agents show 92.3% nt (94.3% aa) identity (Table  
298 S2), indicating that they belong to the same species. Remarkably the L28079  
299 sequence was described in GenBank database as “shallot potyvirus (probably Onion  
300 yellow dwarf virus)” indicating that SMYsAV had been observed previously in shallot  
301 in Russia but that its originality and distinctness had not been recognized at the time.

302 The four symptomatic samples analyzed by HTS in the present study were all  
303 found to be infected by SMYsAV (Table 1), allowing the reconstruction of long scaffolds  
304 for each isolate. Comparison of these four sequences provides nt identity values  
305 ranging from 97.1% and 99.7% (data not shown), giving a first vision of the diversity of  
306 this novel virus.

307

308 **Genomic organization and phylogenetic affinities of the**  
309 **novel carlavirus**

310 Widely different amounts of carlaviral reads were detected in four of the six  
311 samples analyzed by HTS (one asymptomatic and three symptomatic, Table 1). The  
312 genomic sequence was completed for the sample showing the deepest coverage  
313 (sample 13-05, representing 22.7% of the total reads). A unique contig, 8,343 nt-long  
314 and only missing a short region at the 3' end (as judged by comparison with SLV), was  
315 reconstructed. The 5' end was confirmed and the 3' end was determined by RACE  
316 experiments. The genome organization is typical of members of the genus *Carlavirus*,  
317 with six ORFs encoding from 5' to 3' the viral replicase (REP), the triple gene block  
318 proteins (TGB1, 2, 3) involved in viral movement, the coat protein and, finally, a nucleic  
319 acid binding protein, whose role is still unclear (Fig 2B). The sizes of the deduced  
320 proteins are identical to those of the most closely related carlavirus (SLV), with the  
321 exception of the replicase which is slightly larger than in SLV (1,926 aa vs 1,924 aa)  
322 with 12 indels located in the first part of the deduced protein (data not shown). The  
323 conserved motives typical for carlaviral REPs [17] were identified, including a viral  
324 methyltransferase domain (pfam 1660, aa 42-352), an AlkB (2OG-FelI-Oxy-2) domain  
325 (pfam 03171, aa 681-769), a peptidase C23 (carla endopeptidase) domain (aa 930-  
326 1015), a viral helicase 1 domain (pfam 01443, aa 1108-1380) and a RNA-dependent  
327 RNA polymerase 2 domain (pfam 1505-1913, aa 1505-1913).

328 The taxonomical position of the novel carlavirus was confirmed by phylogenetic  
329 analyses performed with complete genome sequences of representative members of  
330 the families *Alphaflexiviridae* and *Betaflexiviridae* (Fig 4) and with replicase and coat  
331 protein sequences from a range of carlaviruses (data not shown). As shown in Fig 4,  
332 the carlavirus unambiguously clusters with related members in the family

333 *Betaflexiviridae*. In this and in the other two trees (not shown), it clusters together with  
334 SLV with 100% bootstrap support, making SLV its closest relative in the genus.  
335 However, the level of identity between SLV and the novel carlavirus in replicase and  
336 coat protein genes (and deduced proteins) is clearly below the species demarcation  
337 threshold accepted for the family *Betaflexiviridae* (72% nt or 80% aa identities in  
338 replicase or CP genes) [18]. Indeed, it shares at the best 76.5% of aa identity in the  
339 CP with SLV (69.6% nt identity, Table S3), demonstrating that it represents a novel  
340 species in the genus *Carlavirus*, for which the name of shallot virus S (ShVS) is  
341 proposed.

342

343 **Fig 4. Neighbor-joining phylogenetic tree reconstructed from the alignment of**  
344 **complete genome sequence of representative members of the families**  
345 ***Alphaflexiviridae* and *Betaflexiviridae*.** Statistical significance of branches was  
346 evaluated by bootstrap analysis (1,000 replicates) and only values above 70% are  
347 indicated. The scale represents 5% nucleotide divergence. The genus and the family  
348 to which each virus belongs are indicated at the right of the figure. The sequences of  
349 shallot virus X and shallot latent virus determined in this work are underlined, and the  
350 novel carlavirus shallot virus S is indicated by a black triangle.

351

## 352 **Analysis of the shallot virus X isolates identified by HTS**

353 Six ShVX isolates were identified from four samples, three for which full genome  
354 sequences were obtained and three for which very long contigs, lacking only genome  
355 ends, were reconstructed (Table 1). The phylogenetic analysis based on the alignment  
356 of the complete genome sequences of *Alphaflexiviridae* members clearly shows that  
357 all the sequences reported here belong to the *Shallot virus X* species, forming a cluster



358 supported by a high bootstrap value (Fig 4). The phylogenetic analysis based on the  
359 CP sequences of allexivirus members and of the available ShVX isolates retrieved  
360 from GenBank confirmed this conclusion (Fig S1). Moreover, the sequences reported  
361 here shared between 79.9% and 97.5% of nt identity (87% to 98.9% aa identity) in the  
362 CP gene with reference isolates (data not shown), levels of identity which are within  
363 the molecular species demarcation criteria accepted for the family *Alphaflexiviridae*  
364 [18]. This conclusion is confirmed by similar analyses performed with polymerase  
365 sequences (data not shown). In the CP tree (Fig S1), four isolates (13-01 variant 1, 13-  
366 04 variant 1, 13-05, and 13-06) belong to a cluster comprising six already known ShVX  
367 isolates including the only available shallot mite-borne latent virus sequence, which  
368 should probably be considered a synonym of ShVX [19]. On the other hand, the two  
369 other isolates (13-01 and 13-04 variant 2) form a divergent cluster, away from other  
370 known ShVX isolates and from the isolates found in co-infection in the same original  
371 plants (Fig S1). These two isolates are very closely related (99.9% nt identity in the CP  
372 gene) and more distant from other isolates (83.5% to 85.5% nt identity, depending on  
373 the isolate considered), including the highly divergent Dindugal isolate GQ268322,  
374 80.2% nt identity).

375

### 376 **Analysis of the shallot latent virus isolates identified by HTS**

377 SLV was identified in three samples. Complete genome sequences were  
378 determined from two of them (SLV 13-02 and 13-06) while for the remaining isolate  
379 (SLV 13-03), a very long contig missing only 84 nt and 34 nt at the 5' and 3' ends,  
380 respectively was obtained. The isolates analyzed here clearly cluster in the *Shallot*  
381 *latent virus* species (Fig 4) but form a distinct and novel cluster well separated from  
382 other known isolates of the virus. For the CP gene, the diversity between them and

383 other SLV isolates ranges between 17.6 and 24.3% in nt (between 5.1 and 10.1% in  
384 aa). Although significant, these values are well within the species demarcation criteria  
385 for the *Betaflexiviridae* family [17]. The three isolates of SLV analyzed here are very  
386 closely related to each other with nt identity levels comprised between 93.7 and 100%  
387 in the CP gene (99 to 100% in aa for deduced proteins, data not shown). Similar values  
388 are observed in the REP gene (90.9 to 99.8% in nt, 96.1 to 99.8% in aa).

389

### 390 **Host range of both novel viruses and Koch's postulates**

391 Trials to mechanically transmit ShVS to herbaceous dicot plants (*N.*  
392 *benthamiana*, *N. occidentalis*, *C. quinoa* and *C. amaranticolor*) were unsuccessful.  
393 Similar negative results were obtained with SMYSaV: no symptoms were visible on  
394 any of the SMYSaV-inoculated plants and no virus could be detected by a specific RT-  
395 PCR assay in any of the inoculated dicot hosts.

396 We then tried to fulfill Koch's postulates, either using each novel virus alone or  
397 using a viral complex composed of ShVX, SLV and the two novel viruses. A pool of  
398 four plants known to harbor this complex was used to inoculate a total of 21 shallot  
399 plants. Most of the inoculated plants (14/21) were found to be co-infected by the four  
400 viruses, but no symptoms could be observed in any of the inoculated plants.  
401 Concerning the inoculation of the novel viruses alone, ShVS was detected in 100% of  
402 the inoculated onion plants and in 29/36 of the inoculated shallots. After five weeks of  
403 observation, no symptoms were recorded on inoculated plants, an observation in line  
404 with the finding of ShVS in one of the asymptomatic plants analyzed by HTS (Table 1).  
405 Similarly, SMYSaV was detected in 75% of the inoculated shallots and in 100% of the  
406 inoculated onion plants. However, no symptoms could be observed in the infected  
407 plants. As a positive control, leaves from OYDV-infected shallots, but free of SMYSaV,

408 were used to inoculate shallot and onion plants. Five weeks after inoculation, typical  
409 yellow mosaic symptoms were observed on both hosts and OYDV was detected in the  
410 symptomatic plants by specific RT-PCR (data not shown). Bulbs from all SMYsSaV-  
411 inoculated shallot plants were replanted and most of the resulting (19/20) plants were  
412 found to be infected by SMYsSaV, showing that the virus accumulates in the bulbs and  
413 can perpetuate the infection over seasons. However, neither the first generation nor  
414 second generation plants displayed symptoms under our greenhouse conditions, even  
415 after eight months of observation.

416

## 417 **Correlation between virus presence and the symptoms** 418 **associated with the shallot mild yellow stripe disease**

419 Despite the negative results of the Koch's postulate trials, which do not allow to  
420 conclude about a causal role of SMYsSaV, the results of the HTS analyses strongly  
421 suggest its involvement in the disease, since it is the only virus that was specifically  
422 associated with the four symptomatic plants analyzed (Table 1). In order to try to  
423 confirm an association between SMYsSaV and the SMYS disease symptoms, a  
424 correlative analysis involving a large number of plants was performed. Over a period  
425 of four years, a total of 351 shallot samples originating from the same region of France  
426 were analyzed for the presence of SMYsSaV, LYSV and OYDV using specific RT-PCR  
427 assays (Table S1). Twenty-two samples were found to be infected by OYDV or/and  
428 LYSV, with a mean of striping score of  $2.43 \pm 1.03$  and a mean score of  $1.5 \pm 1.46$  for  
429 the loss of vigor. In the remaining samples, the incidence of SMYsSaV was found to be  
430 quite high (27.2%) and was highly correlated with the presence of striping symptoms.  
431 Indeed, 92.9% of the samples with stripes (score between 1 and 3) were infected by  
432 SMYsSaV (78/84), whereas 95.9% of the asymptomatic samples were SMYsSaV-free

433 (235/245). The mean score of stripe symptoms for the SMYsSaV-infected samples  
434 ( $2.39 \pm 0.98$ ) was not significantly different from that of OYDV/LYSV-infected samples  
435 ( $2.43 \pm 1.03$ ) (Fig 5), indicating that SYMSaV could have the same impact on infected  
436 plants in terms of striping severity than the two other potyviruses OYDV and LYSV. In  
437 contrast, the effect of SYMSaV infection regarding the loss of vigor is significantly lower  
438 ( $p = 0.0004$ ) than that of OYDV/LYSV infection (Fig 5), strongly suggesting that the  
439 symptoms of the SMYSD consisting of yellow stripes on leaves and moderate loss of  
440 vigor are associated with SMYsSaV.

441 On a smaller number of analyzed plants (45), the potential contribution of ShVS  
442 to the symptomatology was also assessed. The prevalence of this virus was found to  
443 be high in the analyzed samples (53.3%) but the infection was not correlated with  
444 symptomatology. Indeed, the same proportion of symptomatic or asymptomatic  
445 samples from the correlative study were found to be infected by ShVS (48.8% vs 50%,  
446 respectively).

447

448 **Fig 5. Comparison of the mean of symptom score (striping and loss of vigor) in**  
449 **two populations of shallot plants.** OYDV+/LYSV+/SMYsSaV-: plants infected by  
450 onion yellow dwarf virus and/or leek yellow stripe virus and free of shallot mild yellow  
451 stripe associated virus. OYDV-/LYSV-/SMYsSaV+: plants infected by shallot mild yellow  
452 stripe associated virus and free of onion dwarf virus and leek yellow stripe virus.  
453 Whiskers indicate the standard error of the mean. The significance ( $p$ ) was tested by  
454 the Mann-Whitney-Wilcoxon non parametric test [20-21].

455

456 The diversity of SMYsSaV was also analyzed, using the nucleotide sequence of  
457 a short fragment of the CP gene targeted by the RT-PCR diagnostic assay. The

458 average pairwise nucleotide divergence was 1.4% between isolates in this region.  
459 More interestingly, the diversity could be structured into two distinct clusters, as  
460 illustrated by the neighbor-joining tree shown in Fig S2. Beside the major group (cluster  
461 1) which contains 91% of the isolates, an additional group (cluster 2) could be defined  
462 with high bootstrap support (99%). The intra-group average nucleotide divergence is  
463 very low (0.7% and 0.5% for clusters 1 and 2, respectively), in comparison with the  
464 inter-group average divergence (5.2%). Due to the small number of isolates in the  
465 cluster 2, no conclusion could be drawn in terms of correlation between a particular  
466 SMYsSaV cluster and the severity of the induced symptoms.

467

## 468 Discussion

469 The present study was motivated by reports of a yellow stripe disease on shallot  
470 varieties regenerated from OYDV- and LYSV-free bulbs. Subsequent meristem-tip  
471 cultures resulted in the clearance of the symptoms, suggesting a viral etiology. The  
472 objective of this work was therefore to identify the virus(es) involved in this newly  
473 described disease by a combination of HTS-based and classical approaches. Analysis  
474 of six shallot samples (two asymptomatic and four symptomatic) by HTS of purified  
475 dsRNAs revealed the presence of two viruses already known to give asymptomatic  
476 infections in shallot (SLV and ShVX) and of two novel viruses: a carlavirus named  
477 ShVS and a potyvirus named SMYsSaV. A partial sequence was already available in  
478 GenBank (L28079) for the potyvirus, reported with an uncertain taxonomy as probably  
479 belonging to the *Onion yellow dwarf virus* species. The determination of the complete  
480 genome sequence and phylogenetic analyses clearly show that this potyvirus is a  
481 novel species distinct from OYDV. The genomic organization of ShVS and SMYsSaV  
482 are similar to those of *Carlavirus* and *Potyvirus* genera members, respectively.

483 Interestingly, the 3' NCR of SMYSaV with a size of 751 nt is significantly longer than  
484 reported for potyviruses (around 220 nt, Adams et al. 2012c). Other potyviruses  
485 belonging to the same phylogenetic cluster (Fig 3B) share this property, with a 3' NCR  
486 size of 592 nt for LYSV and 598 nt for garlic virus 2 (no data available for garlic mosaic  
487 virus). The biological significance of this observation remains unclear, if any.  
488 Nevertheless, the role of the 3' NCR as a determinant of symptom induction has been  
489 proposed in a few examples [22], without any hypothesis about the mechanism(s)  
490 involved [23].

491 The six ShVX genome sequences (including three near-complete ones lacking  
492 only some nucleotides at both extremities) determined in the present study provide  
493 new insights into the diversity of ShVX. Besides five isolates clustering into a  
494 phylogenetic group comprising all the known ShVX isolates, two isolates (ShVX 13-04  
495 variant 2 and ShVX 13-01 variant 2, very closely related to each other) were found to  
496 be significantly more distant from "classical" isolates, and define a new phylogenetic  
497 cluster, providing evidence for a wider diversity than previously known [24]. Similarly,  
498 three complete genome sequences (near-complete for one) of SLV were determined  
499 through this study, representing isolates from a new phylogenetic cluster and  
500 extending the known diversity range of this virus.

501 The novel potyvirus described here is the sole detected virus associated with  
502 the symptoms of the SMYSD. Firstly, SMYSaV was found in the four symptomatic  
503 samples and not in the asymptomatic ones, which is not the case for any of the other  
504 viruses detected. Secondly, the correlative study conducted over a four-year period  
505 showed a strong association of SMYSaV with the symptoms observed. In particular,  
506 SMYSaV infection is strongly associated with striping symptoms, with a severity  
507 comparable to those caused by OYDV and/or LYSV infection; on the other hand, the

508 impact of SMYsaV infection in terms of loss of vigor is moderate, as reported for the  
509 SMYSD, and quite different from the more severe loss of vigor associated with OYDV  
510 and/or LYSV infection (Fig 5). The four symptomatic samples analyzed by HTS were  
511 infected with a complex of viruses, which is coherent with the strictly vegetative mode  
512 of propagation of shallot. Depending on the sample, various combinations of agents  
513 were found, involving SMYsaV and ShVS, ShVX and/or SLV (Table 1). On this basis,  
514 trials to fulfill Koch's postulates were pursued involving either SMYsaV alone, ShVS  
515 alone or a complex of the four viruses found in symptomatic shallots. However, even  
516 over a long period of observation, no symptoms were observed on any of the  
517 inoculated shallot, even if most of them were found to be infected by the virus(es) they  
518 had been inoculated with. Two hypotheses can be proposed to explain the failure to  
519 observe symptoms on the inoculated plants, one is that the greenhouse conditions  
520 used would not allow the development of such symptoms. The other is that the shallot  
521 variety used in these experiments (a seed-propagated variety, different from the bulb-  
522 propagated ones in which the disease is described) may not be conducive to  
523 symptoms.

524 In the HTS analysis, the novel carlavirus ShVS was detected in three  
525 symptomatic samples as well as in an asymptomatic one, suggesting that as for other  
526 shallot infecting carlaviruses, its infection is latent. This hypothesis is confirmed by the  
527 finding that the virus was equally distributed between symptomatic and asymptomatic  
528 plants in the correlation study. Our results do not allow us to conclude regarding a  
529 potential synergistic effect of ShVS with SMYsaV infection, as shown for SLV and  
530 GarCLV with potyviruses [2]. Overall, the very tight correlation between SMYsaV  
531 infection and the SMYSD symptoms support the notion of an association if not a causal  
532 role for SMYsaV, but further experiments are necessary to unambiguously





533 demonstrate it and to explore potential synergistic effects with other co-infecting  
534 viruses.

535

## 536 **Acknowledgements**

537 The authors would like to thank the GenomEast platform (Institut de Génétique  
538 et de Biologie Moléculaire et Cellulaire, CNRS/INSERM/Université de Strasbourg,  
539 Illkirch, France) for the Illumina sequencing, and T. Mauduit and C. Chesseron for  
540 taking care of experimental plants.

541

## 542 **References**

- 543 1. Brewster JL. Onions and other vegetable alliums. CAB International, Oxon, UK;  
544 1994.
- 545 2. Katis NI, Maliogka VI, Dovas CI. Viruses of the genus *Allium* in the  
546 Mediterranean region. Adv. Virus Res. 2012; 84: 163-208.
- 547 3. Sako I. Occurrence of *Garlic latent virus* in *Allium* species. Plant Prot. 1989; 43:  
548 389-392
- 549 4. Turina M, Tavella L, Ciuffo M. Tospoviruses in the Mediterranean area. Adv.  
550 Virus Res. 2012; 84: 403-437.
- 551 5. Marais A, Faure C, Bergey B, Candresse T. Viral Double-Stranded RNAs  
552 (dsRNAs) from Plants: Alternative Nucleic Acid Substrates for High-Throughput  
553 Sequencing. Methods Mol. Biol. 2018 ; 1746: 45-53.
- 554 6. Candresse T, Marais A, Faure C, Gentit P. Association of *Little cherry virus 1*  
555 (LChV1) with the Shirofugen stunt disease and characterization of the genome  
556 of a divergent LChV1 isolate. Phytopathology. 2013 ; 103: 293-298.

- 557 7. Altschul SF, Gish W, Miller W, Myers EW, Lipman DJ. Basic local alignment  
558 search tool. *J. Mol. Biol.* 2010; 215: 403-410.
- 559 8. Foissac X, Svanella-Dumas L, Gentit P, Dulucq MJ, Marais A, Candresse T.  
560 Polyvalent degenerate oligonucleotides reverse transcription-polymerase chain  
561 reaction: A polyvalent detection and characterization tool for Trichoviruses,  
562 Capilloviruses, and Foveaviruses. *Phytopathology.* 2005 ; 95: 617-625.
- 563 9. Marais A, Faure C, Couture C, Bergey B, Gentit P, Candresse T.  
564 Characterization by deep sequencing of divergent *Plum bark necrosis stem*  
565 *pitting-associated virus* (PBNSPaV) isolates and development of a broad-  
566 spectrum PBNSPaV detection assay. *Phytopathology.* 2014 ;104: 660-666.
- 567 10. Youssef F, Marais A, Faure C, Barone M, Gentit P, Candresse T.  
568 Characterization of *Prunus*-infecting Apricot latent virus-like Foveaviruses:  
569 Evolutionary and taxonomic implications. *Virus Res.* 2011 ; 155: 440-445
- 570 11. Tamura K, Stecher G, Peterson D, Filipski A, Kumar S. MEGA6: Molecular  
571 Evolutionary Genetics Analysis version 6.0. *Mol. Biol. Evol.* 2013; 30: 2725-  
572 2729.
- 573 12. Thompson JD, Higgins DG, Gibson TJ. CLUSTALW: improving the sensitivity  
574 of progressive multiple sequence alignment through sequence weighting,  
575 position-specific gap, penalties and weight matrix choice. *Nucleic Acids Res.*  
576 1994; 22: 4673-4680.
- 577 13. Adams MJ, Zerbini FM, French R, Rabenstein F, Steger DC, Valkonen JPT.  
578 Family *Potyviridae*. In: King AMQ, Adams MJ, Carstens EB, Lefkowitz EJ,  
579 editors. *Virus Taxonomy – Ninth Report on the International Committee on*  
580 *Taxonomy of Viruses.* Elsevier Academic Press; 2012. Pp 1069-1089

- 581 14. Adams MJ, Antoniw JF, Beaudoin F. Overview and analysis of the polyprotein  
582 cleavage sites in the family *Potyviridae*. Mol. Plant Pathol. 2005; 6: 471-487.
- 583 15. Blanc S, Lopez-Moya JJ, Wang R, Garcia-Lampasona S, Thornbury DW,  
584 Pirone TP. A specific interaction between coat protein and helper component  
585 correlates with aphid transmission of a potyvirus. Virology. 1997; 231:141-147.
- 586 16. Wylie SJ, Adams M, Chalam C, Kreuze J, Lopez-Moya JJ, Oshima K et al. ICTV  
587 Virus Taxonomy Profile: *Potyviridae*. J. Gen. Virol. 2017; 98: 352–354
- 588 17. Adams MJ, Candresse T, Hammond J, Kreuze JF, Martelli GP, Namba S et al.  
589 Family *Betaflexiviridae*. In: King AMQ, Adams MJ, Carstens EB, Lefkowitz EJ,  
590 editors. Virus Taxonomy – Ninth Report on the International Committee on  
591 Taxonomy of Viruses. Elsevier Academic Press; 2012. pp 920-941.
- 592 18. Adams MJ, Candresse T, Hammond J, Kreuze JF, Martelli GP, Namba S et al.  
593 Family *Alphaflexiviridae*. In: King AMQ, Adams MJ, Carstens EB, Lefkowitz EJ,  
594 editors. Virus Taxonomy – Ninth Report on the International Committee on  
595 Taxonomy of Viruses. Elsevier Academic Press; 2012. pp 905-919
- 596 19. Perez-Egusquiza Z, Ward LI, Clover GRG, Fletcher JD, Van Der Vlugt RAA.  
597 First report of Shallot virus X in New Zealand. Plant Pathol. 2009; 58: 407.
- 598 20. Wilcoxon F. Individual comparisons by ranking methods, Biometrics Bull. 1945;  
599 1: 80-83
- 600 21. Mann HB, Whitney DR. On a test of whether one of two random variables is  
601 stochastically larger than the other. Ann. Math. Stat. 1947; 18: 50-60.
- 602 22. Rodriguez-Cerezo E, Klein PG, Shaw JG. A determinant of disease symptom  
603 severity is located in the 3'-terminal noncoding region of the RNA of a plant  
604 virus. Proc. Natl. Acad. Sci. 1991; 88: 9863-9867.

605 23. Revers F, García JA. Molecular biology of potyviruses. *Adv. Virus Res.* 2015;  
606 92: 101-199.

607 24. Majumder S, Baranwal VK. Sequence comparison and phylogeny of nucleotide  
608 sequence of coat protein and nucleic acid binding protein of a distinct isolate of  
609 Shallot virus X from India. *Indian J. Virol.* 2011; 22: 63-65

610

## 611 **Supporting information**

612 **S1 Fig. Neighbor-joining tree reconstructed from the alignment of amino acid**  
613 **sequences of the coat protein of allexivirus members and shallot virus X**  
614 **isolates.** Validity of branches was evaluated by bootstrap analysis (1,000 replicates).  
615 Only bootstrap values above 70% are shown. The scale bar represents 5% amino acid  
616 divergence. The sequences of ShVX determined in this work are underlined. Potato  
617 virus X (NC011620, genus *Potexvirus*) was used as outgroup.

618

619 **S2 Fig. Neighbor-joining tree reconstructed from the alignment of nucleotide**  
620 **sequences of a partial fragment (247 nt) of the coat protein gene obtained from**  
621 **a range of shallot mild yellow stripe associated virus isolates.** Statistical  
622 significance of the branches was evaluated by bootstrap analysis (1,000 replicates).  
623 Only bootstrap values higher than 70% are indicated. The scale bar represents 5%  
624 nucleotide divergence. The primer pair used for the RT-PCR (ShMYSV-F1/ShMYSV-  
625 R1) is indicated in Table S1. Relevant nucleotide sequences were deposited in the  
626 GenBank database under accession numbers MG910501 to MG910598. Isolates  
627 found in co-infection with onion yellow dwarf virus or leek yellow stripe virus are  
628 indicated in italics. The scores of leaves striping (S) and loss of vigor (V) are indicated

629 (scale of notation from 0 to 3). The two identified phylogenetic clusters are indicated  
630 on the right of the figure.

631

632 **S1 Table. Oligonucleotides used in the present study for the completion of the**  
633 **seven viral genomes and the detection of onion dwarf virus and leek yellow**  
634 **stripe virus**

635

636 **S2 Table. Percentages of identities in nucleotides (nt) and in amino acids (aa)**  
637 **between shallot mild yellow stripe associated virus and members of the genus**  
638 ***Potyvirus* over the large ORF and in two genomic regions**

639

640 **S3 Table. Percentage of identity in the replicase and coat protein genes and**  
641 **deduced proteins between shallot virus S and closest relative carlaviruses <sup>a</sup>.**
